# Supplementary material for: SARC006: Phase II Trial of Chemotherapy in Sporadic and Neurofibromatosis Type 1 Associated Chemotherapy-Naive Malignant Peripheral Nerve Sheath Tumors
Source: Hindawi journal article supplement (doi:10.1155/2017/8685638), 2017-01-01
Supplement: f1 [file 8685638.f1.pdf]

**SUPPLEMENTARY APPENDIX**

**Table S1:** Chemotherapy Schema

Patients receiving radiation therapy for local control

| Cycle | 1                                                    | 2                                                   | 3                                           | 4                                           | 5                                           | 6                                           | 7                                                   | 8                                                   |
|-------|------------------------------------------------------|-----------------------------------------------------|---------------------------------------------|---------------------------------------------|---------------------------------------------|---------------------------------------------|-----------------------------------------------------|-----------------------------------------------------|
| Week  | 0                                                    | 3                                                   | 6                                           | 9                                           | 12                                          | 15                                          | 18                                                  | 21                                                  |
| Drugs | Ifos<br>Doxo<br>Dxrz*<br>Mesna<br>G-CSF/<br>Neulasta | Ifos<br>Doxo<br>Dxrz<br>Mesna<br>G-CSF/<br>Neulasta | Ifos<br>Etop<br>Mesna<br>G-CSF/<br>Neulasta | Ifos<br>Etop<br>Mesna<br>G-CSF/<br>Neulasta | Ifos<br>Etop<br>Mesna<br>G-CSF/<br>Neulasta | Ifos<br>Etop<br>Mesna<br>G-CSF/<br>Neulasta | Ifos<br>Doxo<br>Dxrz<br>Mesna<br>G-CSF/<br>Neulasta | Ifos<br>Doxo<br>Dxrz<br>Mesna<br>G-CSF/<br>Neulasta |

Patients not receiving radiation therapy for local control

| Cycle | 1                                                   | 2                                                   | 3                                           | 4                                           | 5                                                   | 6                                                   | 7                                           | 8                                           |
|-------|-----------------------------------------------------|-----------------------------------------------------|---------------------------------------------|---------------------------------------------|-----------------------------------------------------|-----------------------------------------------------|---------------------------------------------|---------------------------------------------|
| Week  | 0                                                   | 3                                                   | 6                                           | 9                                           | 12                                                  | 15                                                  | 18                                          | 21                                          |
| Drugs | Ifos<br>Doxo<br>Dxrz<br>Mesna<br>G-CSF/<br>Neulasta | Ifos<br>Doxo<br>Dxrz<br>Mesna<br>G-CSF/<br>Neulasta | Ifos<br>Etop<br>Mesna<br>G-CSF/<br>Neulasta | Ifos<br>Etop<br>Mesna<br>G-CSF/<br>Neulasta | Ifos<br>Doxo<br>Dxrz<br>Mesna<br>G-CSF/<br>Neulasta | Ifos<br>Doxo<br>Dxrz<br>Mesna<br>G-CSF/<br>Neulasta | Ifos<br>Etop<br>Mesna<br>G-CSF/<br>Neulasta | Ifos<br>Etop<br>Mesna<br>G-CSF/<br>Neulasta |

Dxrz =Dexrazoxane 375 mg/ m<sup>2</sup>/ dose IV over 15-30 minutes immediately prior to Doxo

on days 1, 2

\*Dexrazoxane use was not mandatory and was administered per institutional guidelines.

Doxo =Doxorubicin 37.5 mg/ m<sup>2</sup>/ dose IV over 15 minutes on days 1, 2

Ifos = Ifosfamide 1,800 mg/ m<sup>2</sup>/ dose IV over 60 minutes on days 1, 2, 3, 4, 5

Etop = Etoposide 100 mg/ m<sup>2</sup>/ dose IV over 60 minutes on days 1, 2, 3, 4, 5

Mesna = Mesna 360 mg/ m<sup>2</sup>/ dose IV, first dose over 60 minutes (with Ifos) and doses 2-8 over 15 minutes every 3 hours on days 1, 2, 3, 4, 5 with Ifos. Other standard mesna dosing regimens including oral administration of mesna (360 mg/ m<sup>2</sup> PO q 3hr supplied as scored 400mg tablets), used at participating institutions, were also permissible.

G-CSF = Filgrastim 5µg/kg/dose SC daily starting 24-36 hours after last dose of chemotherapy until post-nadir ANC ≥1,500/µl, or peg-filgrastim (neulasta™) for patients weighing ≥ 45kg: 6mg SC x 1 dose starting 24 hours after completion of chemotherapy.

Institutional guidelines could be used for hydration and preparation and administration of the standard chemotherapy and supportive care agents

**Table S2:** On Study Evaluation

|                                         | Prior to therapy | Prior to cycles                        | During treatment cycles             |
|-----------------------------------------|------------------|----------------------------------------|-------------------------------------|
| History and Physical exam               | X                | All Cycles                             |                                     |
| Phenotypic analysis                     | X                |                                        |                                     |
| CBC, differential                       | X                | All cycles                             | Weekly to twice weekly <sup>@</sup> |
| PT,PTT, fibrinogen                      | X                |                                        |                                     |
| Electolytes <sup>§</sup> , Ca, Mg, Phos | X                | All cycles                             | Weekly                              |
| Liver function tests <sup>¶</sup>       | X                | All cycles                             | Weekly                              |
| Urine pregnancy test                    | X                | 3,5,7                                  |                                     |
| MUGA or ECHo                            | X                | Pre cycle 3 doxo                       |                                     |
| Chest X-ray                             | X                | As clinically indicated                |                                     |
| Plain film of primary disease           | X                | As clinically indicated                |                                     |
| CT of chest                             | X                | Cycles 3,5,7                           |                                     |
| MRI of primary                          | X                | Cycles 3,5,7                           |                                     |
| <sup>18</sup> F <sup>18</sup> FDG-PET   | X                | Cycle 5                                |                                     |
| Cr Cl*                                  | X                |                                        |                                     |
| Urinalysis                              | X                | All cycles <sup>¥</sup>                |                                     |
| Serum proteomics                        | X                | Cycles 5**, 7                          |                                     |
| Tumor specimen                          | X                | Cycle 5 (if surgery for local control) |                                     |

<sup>@</sup> Monitor CBC twice weekly once ANC ≤1,000/μL until ANC recovers to ≥500/μL

<sup>§</sup> Na, K, CL, CO<sub>2</sub>, BUN, creatinine, glucose

<sup>¶</sup> ALT, AST, bilirubin, alkaline phosphatase, LDH

\* IF serum creatinine abnormal

¥ Frequency of urinalysis during ifosfamide treatment will follow institutional guidelines

\*\*After recovery from cycle 4

**Table S3.** Evaluation of patients based on response after cycle 4

| Stratum                                       | NF1 MPNST | Sporadic MPNST |
|-----------------------------------------------|-----------|----------------|
| Response evaluation post cycle 4              | 28        | 9              |
| Complete Response (CR)                        | -         | -              |
| Partial Response (PR)                         | 5         | 4              |
| Stable Disease (SD)                           | 20        | 4              |
| Progressive Disease (PD)                      | 3         | 1              |
| Initial tumor size > 5cm*                     |           |                |
| PR                                            | 3         | 3              |
| SD                                            | 19        | 3              |
| PD                                            | 3         | 1              |
| Initial tumor size < 5cm*                     |           |                |
| PR                                            | 2         | 1              |
| SD                                            | 1         | 1              |
| PD                                            | 0         | 0              |
| Metastatic disease at diagnosis (stage 4)     |           |                |
| PR                                            | 1         | 2              |
| SD                                            | 10        | 2              |
| PD                                            | 0         | 0              |
| Non-metastatic disease at diagnosis (stage 3) |           |                |
| PR                                            | 4         | 2              |
| SD                                            | 10        | 2              |
| PD                                            | 3         | 1              |
| ≥33 years old                                 |           |                |
| PR                                            | 3         | 4              |

|  |    |    |   |
|--|----|----|---|
|  | SD | 10 | 2 |
|  | PD | 1  | 1 |

\*largest diameter

**Table S4:** Central pathology evaluation of tumor samples prior to treatment

|                              |                    | <b>NF1<br/>(n= 26)</b> | <b>Sporadic<br/>(n= 11)</b> |
|------------------------------|--------------------|------------------------|-----------------------------|
| Location                     | Central            | 6                      | 2                           |
|                              | Nerve plexus       | 3                      | 0                           |
|                              | Trunk              | 10                     | 6                           |
|                              | Head and Neck      | 2                      | 0                           |
|                              | Retroperitoneal    | 1                      | 0                           |
|                              | Proximal limb      | 2                      | 1                           |
|                              | Distal limb        | 2                      | 1                           |
|                              | Metastasis         | 0                      | 1                           |
| Arising from<br>Neurofibroma | Yes                | 13                     | 0                           |
|                              | No                 | 5                      | 9                           |
|                              | Unclear            | 8                      | 2                           |
| Histologic Variant           | Conventional       | 15                     | 7                           |
|                              | Perineural         | 1                      | 0                           |
|                              | Epithelioid        | 0                      | 2                           |
|                              | Divergent (Triton) | 1                      | 0                           |
|                              | Mixed histology    | 9                      | 2                           |
| Extracellular<br>mucin       | 0                  | 14                     | 6                           |
|                              | 1                  | 9                      | 3                           |
|                              | 2                  | 3                      | 1                           |
|                              | 3                  | 0                      | 1                           |
| Intravascular<br>invasion    |                    | 7                      | 2                           |

|                             |                          |    |    |
|-----------------------------|--------------------------|----|----|
| Cellularity                 | low                      | 0  | 0  |
|                             | moderate                 | 5  | 4  |
|                             | high                     | 21 | 7  |
| Cellular pleomorphism       | 1                        | 9  | 4  |
|                             | 2                        | 14 | 5  |
|                             | 3                        | 3  | 2  |
| Nuclear atypia              | 1                        | 4  | 1  |
|                             | 2                        | 17 | 5  |
|                             | 3                        | 5  | 5  |
| Nuclear chromatin           | bland                    | 1  | 2  |
|                             | hyperchromatic           | 19 | 3  |
|                             | vesicular                | 3  | 6  |
|                             | hyperchromatic/vesicular | 3  | 0  |
| Macronucleoli               |                          | 8  | 5  |
| Max #mitoses per 10x HPF    |                          | 44 | 44 |
| Atypical mitoses            |                          | 4  | 4  |
| Small cells (high NC ratio) | absent                   | 20 | 7  |
|                             | 1-10%                    | 1  | 1  |
|                             | 10-50%                   | 4  | 3  |
| Necrosis                    | absent                   | 5  | 1  |
|                             | 1-10%                    | 8  | 2  |
|                             | 10-50%                   | 10 | 5  |
|                             | >50%                     | 3  | 3  |



|                                        |  |             |            |
|----------------------------------------|--|-------------|------------|
| Nuclear<br>pseudopalisading            |  | 6           | 3          |
| <b>IMMUNOHISTOCHEMISTRY</b>            |  |             |            |
| s100                                   |  | 17+ (of 23) | 8+ (of 11) |
| Leu-7                                  |  | 12+ (of 23) | 4 (of 11)  |
| EMA                                    |  | 3 (of 21)   | 3 (of 11)  |
| Desmin                                 |  | 6 (of 23)   | 0 (of 11)  |
| p53                                    |  | 16 (of 22)  | 10 (of 11) |
| Ki67 (MIB-1)                           |  | Mean: 31%   | Mean: 50%  |
| EGFR                                   |  | 19 (of 21)  | 8 (of 11)  |
| <b>FISH</b>                            |  |             |            |
| EGFR (7p12)<br>amplification           |  | 3 (of 20)   | 1 (of 8)   |
| TOPO2A (17q21-<br>q22) amplification   |  | 5 (of 19)   | 2 (of 10)  |
| Her2/Neu (17q11-<br>q12) amplification |  | 2 (of 18)   | 0 (of 10)  |
| Cyclin D1 (11q13)<br>amplification     |  | 1 (of 19)   | 2 (of 9)   |
| c-MYC (8q24)<br>amplification          |  | 5 (of 20)   | 0 (of 8)   |
| N-MYC (2p24)<br>amplification          |  | 3 (of 16)   | 1 (of 6)   |
| NF1 (17q11)<br>deletion                |  | 7 (of 19)   | 0 (of 9)   |

|                         |  |            |           |
|-------------------------|--|------------|-----------|
| p16 (9p21)<br>deletion  |  | 10 (of 14) | 3 (of 6)  |
| RB (13q14)<br>deletion  |  | 1 (of 17)  | 2 (of 10) |
| p53 (17q13)<br>deletion |  | 6 (of 19)  | 2 (of 9)  |
